# Supplementary material for: Janus interface enables reversible Zn-ion battery by regulating interfacial water structure and crystal-orientation
Source: Royal Society of Chemistry journal article supplement (doi:10.1039/d3sc05334b), 2023-12-19
Supplement: d3sc05334b1.xlsx [file d3sc05334b1.xlsx]

## Sheet: Sheet1
Pure Zn(ClO4)2			With MET
Potential (V)	Differential capacitance (μF)	Smoothed	Potential (V)	Differential capacitance (μF)	Smoothed
-1.4	0.000204778	0.000225642	-1.4	9.52936e-05	9.76766e-05
-1.39	0.000210685	0.00022462	-1.39	9.76906e-05	9.6042e-05
-1.38	0.000219666	0.000223458	-1.38	9.73323e-05	9.44439e-05
-1.37	0.000251438	0.000222155	-1.37	9.44458e-05	9.28825e-05
-1.36	0.00024726	0.000220711	-1.36	8.93578e-05	9.13576e-05
-1.35	0.000223866	0.000219127	-1.35	8.62598e-05	8.98693e-05
-1.34	0.000220456	0.000217402	-1.34	8.51983e-05	8.84176e-05
-1.33	0.000247184	0.000215537	-1.33	8.85627e-05	8.70025e-05
-1.32	0.000230542	0.000213531	-1.32	9.12525e-05	8.5624e-05
-1.31	0.000177599	0.000211385	-1.31	8.77332e-05	8.4282e-05
-1.3	0.000176321	0.000209098	-1.3	8.19535e-05	8.29767e-05
-1.29	0.000199794	0.00020667	-1.29	7.77518e-05	8.17079e-05
-1.28	0.000232529	0.000204102	-1.28	7.74116e-05	8.04757e-05
-1.27	0.000285011	0.000201394	-1.27	7.97374e-05	7.92801e-05
-1.26	0.000259257	0.000198545	-1.26	8.16175e-05	7.81211e-05
-1.25	0.000199844	0.000195555	-1.25	7.92217e-05	7.69987e-05
-1.24	0.000180826	0.000190123	-1.24	7.69254e-05	7.57966e-05
-1.23	0.00017439	0.000188269	-1.23	7.46184e-05	7.49999e-05
-1.22	0.000172651	0.000184509	-1.22	7.2644e-05	7.40091e-05
-1.21	0.000182296	0.000178908	-1.21	7.3516e-05	7.29385e-05
-1.2	0.000185007	0.000173081	-1.2	7.57904e-05	7.19315e-05
-1.19	0.00017508	0.000168616	-1.19	7.69998e-05	7.12382e-05
-1.18	0.000165974	0.000164764	-1.18	7.37885e-05	7.05112e-05
-1.17	0.000145023	0.00016027	-1.17	7.02717e-05	6.97847e-05
-1.16	0.000140049	0.000155721	-1.16	6.72164e-05	6.89573e-05
-1.15	0.000138707	0.000150504	-1.15	6.49411e-05	6.79779e-05
-1.14	0.000127695	0.000144931	-1.14	6.40787e-05	6.7071e-05
-1.13	0.000126881	0.000139597	-1.13	6.31386e-05	6.63063e-05
-1.12	0.000123726	0.00013457	-1.12	6.28645e-05	6.56301e-05
-1.11	0.000114723	0.000130654	-1.11	6.38731e-05	6.4855e-05
-1.1	0.000114476	0.000126868	-1.1	6.27653e-05	6.39132e-05
-1.09	0.000114311	0.000122458	-1.09	6.0431e-05	6.2908e-05
-1.08	0.000115055	0.000118043	-1.08	5.83495e-05	6.20205e-05
-1.07	0.000120725	0.000114735	-1.07	5.93499e-05	6.14918e-05
-1.06	0.000116146	0.000111418	-1.06	6.34658e-05	6.12332e-05
-1.05	0.000105454	0.000106721	-1.05	6.63482e-05	6.09875e-05
-1.04	0.000102666	0.000101868	-1.04	6.67935e-05	6.06141e-05
-1.03	0.00010687	9.77018e-05	-1.03	6.42079e-05	6.00964e-05
-1.02	0.000110427	9.48135e-05	-1.02	6.13861e-05	5.95541e-05
-1.01	0.000107592	9.41042e-05	-1.01	6.06381e-05	5.91485e-05
-1	9.52366e-05	9.33039e-05	-1	6.20077e-05	5.89135e-05
-0.99	8.88592e-05	9.11404e-05	-0.99	6.11504e-05	5.87358e-05
-0.98	8.15339e-05	8.87192e-05	-0.98	5.92395e-05	5.8707e-05
-0.97	7.93797e-05	8.63548e-05	-0.97	5.78618e-05	5.87057e-05
-0.96	8.02195e-05	8.40885e-05	-0.96	5.65468e-05	5.86192e-05
-0.95	7.93006e-05	8.22795e-05	-0.95	5.64065e-05	5.8592e-05
-0.94	8.23349e-05	8.08238e-05	-0.94	5.76523e-05	5.8657e-05
-0.93	8.01387e-05	7.94362e-05	-0.93	5.81789e-05	5.89325e-05
-0.92	7.8095e-05	7.80485e-05	-0.92	5.59114e-05	5.93315e-05
-0.91	7.68141e-05	7.62456e-05	-0.91	5.60689e-05	5.99308e-05
-0.9	7.62258e-05	7.44308e-05	-0.9	5.78198e-05	6.07244e-05
-0.89	7.7374e-05	7.26746e-05	-0.89	5.94607e-05	6.14608e-05
-0.88	7.19222e-05	7.08401e-05	-0.88	5.99984e-05	6.21281e-05
-0.87	6.89929e-05	6.92107e-05	-0.87	6.0157e-05	6.30971e-05
-0.86	6.61278e-05	6.75869e-05	-0.86	6.45463e-05	6.42402e-05
-0.85	6.42598e-05	6.58073e-05	-0.85	6.93837e-05	6.55399e-05
-0.84	6.75013e-05	6.41763e-05	-0.84	7.28767e-05	6.6968e-05
-0.83	6.88438e-05	6.25954e-05	-0.83	7.22485e-05	6.83057e-05
-0.82	6.59361e-05	6.11217e-05	-0.82	6.77022e-05	6.94765e-05
-0.81	5.88019e-05	5.99869e-05	-0.81	6.55831e-05	7.07186e-05
-0.8	5.53478e-05	5.88797e-05	-0.8	6.59088e-05	7.2032e-05
-0.79	5.75689e-05	5.76174e-05	-0.79	6.82536e-05	7.34168e-05
-0.78	5.95051e-05	5.64541e-05	-0.78	7.25117e-05	7.4873e-05
-0.77	5.72173e-05	5.55831e-05	-0.77	7.70371e-05	7.64005e-05
-0.76	5.32205e-05	5.49622e-05	-0.76	7.96577e-05	7.79994e-05
-0.75	5.17335e-05	5.4488e-05	-0.75	8.15339e-05	7.96696e-05
-0.74	5.29022e-05	5.38865e-05	-0.74	8.32823e-05	8.14111e-05
-0.73	5.03432e-05	5.32184e-05	-0.73	8.15339e-05	8.32241e-05
-0.72	4.77182e-05	5.23558e-05	-0.72	8.34131e-05	8.51083e-05
-0.71	4.83705e-05	5.1573e-05	-0.71	8.97608e-05	8.70639e-05
-0.7	5.02162e-05	5.09194e-05	-0.7	9.49527e-05	8.90909e-05
-0.69	5.11354e-05	5.03576e-05	-0.69	0.000101748	9.11892e-05
-0.68	4.93142e-05	5.00967e-05	-0.68	0.000104554	9.33589e-05
-0.67	4.95752e-05	4.99487e-05	-0.67	0.000105875	9.55999e-05
-0.66	5.00741e-05	4.9879e-05	-0.66	0.000103266	9.79123e-05
-0.65	5.12506e-05	4.98276e-05	-0.65	9.98343e-05	0.000100296
-0.64	5.4125e-05	4.99322e-05	-0.64	0.000105106	0.000102751
-0.63	5.14327e-05	5.03014e-05	-0.63	0.000112853	0.000105277
-0.62	4.81802e-05	5.0613e-05	-0.62	0.000107664	0.000107875
-0.61	4.93601e-05	5.08659e-05	-0.61	0.00010637	0.000110544
-0.6	4.96835e-05	5.11321e-05	-0.6	0.000106583	0.000113285
-0.59	4.79048e-05	5.14563e-05	-0.59	0.000105175	0.000116097
-0.58	5.00584e-05	5.19873e-05	-0.58	0.000109591	0.00011898
-0.57	5.214e-05	5.27027e-05
-0.56	5.26747e-05	5.34769e-05
-0.55	5.43466e-05	5.40454e-05
-0.54	5.53286e-05	5.46149e-05
-0.53	5.47202e-05	5.53397e-05
-0.52	5.50227e-05	5.61122e-05
-0.51	5.75481e-05	5.68796e-05
-0.5	5.7946e-05	5.75873e-05
-0.49	5.69309e-05	5.82554e-05
-0.48	5.83495e-05	5.90551e-05
-0.47	6.25926e-05	5.98502e-05
-0.46	6.23232e-05	6.05715e-05
-0.45	6.34658e-05	6.12467e-05
-0.44	6.44418e-05	6.18798e-05
-0.43	6.25189e-05	6.24823e-05
-0.42	6.16953e-05	6.29914e-05
-0.41	6.18631e-05	6.34611e-05
-0.4	6.49411e-05	6.38733e-05
