# Supplementary material for: Janus interface enables reversible Zn-ion battery by regulating interfacial water structure and crystal-orientation
Source: Royal Society of Chemistry journal article supplement (doi:10.1039/d3sc05334b), 2023-12-19
Supplement: d3sc05334b5.xlsx [file d3sc05334b5.xlsx]

## Sheet: Sheet1
	Pure Zn(ClO4)2	With MET
Zeta potential （mV）	-111.43	-260.53
